# Supplementary material
Source: PubMed Central journal article supplement (PMC2048781)
Supplement: plntphys_pp.107.107086_1.pdf [file plntphys_pp.107.107086_1.pdf]

**Supplemental Table S1.** List of primers used for cloning and real-time RT-PCR analysis

| Gene           | Forward (F) and reverse (R) primers (5' to 3')                                                                                          | Amplicon (bp)                            |
|----------------|-----------------------------------------------------------------------------------------------------------------------------------------|------------------------------------------|
| <b>Cloning</b> |                                                                                                                                         |                                          |
| <i>TUA2</i>    | (F) CCGAATTCAARTGYGGYATYAACTA + (R)oligo dT primer<br>(R) TGGTGGCCAAACCCCTCACGGTCCCTTCTC + (F)SMART II primer                           | 515<br>1,532                             |
| <i>TUA3</i>    | (F) CCGAATTCAARTGYGGYATYAACTA + (R)oligo dT primer<br>(R) GAATAGGAAACAAGTCGCAGTAGC + (F)SMART II primer                                 | 571<br>1,541                             |
| <i>TUA4</i>    | (F) GAAGTTGGTGCTGAAGGTGT<br>(R) CAAATACGAAGACAGACATAGTCTTGAG<br>(R) CAAATACGAAGACAGACATAGTCTTGAG + (F)SMART II primer                   | 495<br>1,592                             |
| <i>TUA5</i>    | (F) GAAMGACCCACMTACACMAA<br>(R) CAGTAGCTTTAGCATAACGAAAGAATAGG<br>(F) ACATGCATGCGAGAGTGCATTTCGATCCA<br>(R) CAGTAGCTTTAGCATAACGAAAGAATAGG | 865<br>1,356                             |
| <i>TUA6</i>    | (F) ATGAGGGAGATAATAAGCATAACATATTGGAC<br>(R) CTAGTAATCTTCCTCCTCACCTTCCTC                                                                 | 1,350                                    |
| <i>TUA7</i>    | (F) ATGAGAGAGTGCATCTCAATCCACATTGG<br>(R) TTACATGTATTCTCTCCATCATCGTCTTCC                                                                 | 1,356                                    |
| <i>TUA8</i>    | (F) ATGAGGGAGATAATAAGCATAACATATTGGAC<br>(R) TCAGTAATCTTCGTCTCACCCCTCG                                                                   | 1,350                                    |
| <b>RT-PCR</b>  |                                                                                                                                         |                                          |
| <i>TUA1</i>    | (F) CTGATARTAGGRAGTGTACTTCTCTTTTGTG<br>(R) GAGAAAATTARYAATAGGSCTCCAATCCCTTGTA                                                           | 142                                      |
| <i>TUA2</i>    | (F) GTWATTAMCACCAGCAATCGAGAAGGACC<br>(R) GTCGAMCTCGAAACCATAAAAAACATTAA                                                                  | 162                                      |
| <i>TUA3</i>    | (F) CTGCATTACCTGTTTGTGCTTGACACTT<br>(R) TCATGCTTCAGAGACATAAATGTGTTC                                                                     | 186                                      |
| <i>TUA4</i>    | (F) CTTGCAATAGMATTTCATCTGGGAAATGGT<br>(R) CTTCAAATACGAAGACAGACATAGTCTTG                                                                 | 156                                      |
| <i>TUA5</i>    | (F) CTTTCGTARTGGGTGTAGCCTAATATGATG<br>(R) CACCTTYGAAACAATAAAAGCTTCAAATGG                                                                | 126                                      |
| <i>TUA7</i>    | (F) GGAAGTTGTTCTGCCAATGGGCTC<br>(R) CTTGTCCATCCAGTTACCTACAACC                                                                           | 94                                       |
| <i>TUA6/8</i>  | (F) GCGAGGAAACAGCAGTTGTATGTC + TUA6/8(R)                                                                                                | 102 ( <i>TUA6</i> ); 100 ( <i>TUA8</i> ) |
| <i>TUA6</i>    | (F) GATTACAAGTTTGATCTCATGTATTCC + TUA6/8(R)                                                                                             | 294                                      |
| <i>TUA8</i>    | (F) GACCACAAGTTTGATCTCATGTACTCT + TUA6/8(R)                                                                                             | 292                                      |
| -              | TUA6/8(R) CAATTCACAGATCACTGACATGGA                                                                                                      | -                                        |
| <i>TUB1</i>    | (R) ATTACAGCAAAAAGATGACAAC + TUB(F)                                                                                                     | 280                                      |
| <i>TUB2</i>    | (R) AAACCCTACATACTAAAGAAG + TUB(F)                                                                                                      | 237                                      |
| <i>TUB3</i>    | (R) TAACTCCACATATTGGAAAGC + TUB(F)                                                                                                      | 280                                      |
| <i>TUB4</i>    | (R) AACATTGCTTGAAAATAAATCC + TUB(F)                                                                                                     | 276                                      |
| <i>TUB5/6</i>  | (R) CCCAACTCCAAGCATTYTCAT + TUB(F)                                                                                                      | 198                                      |
| <i>TUB7</i>    | (R) ATTTGACCCCAACAACAGA + TUB(F)                                                                                                        | 250                                      |
| <i>TUB8</i>    | (R) TAGTTTGACCCCAATGAGA + TUB(F)                                                                                                        | 246                                      |
| <i>TUB9</i>    | (R) CACCAGAAACAACCTCATCCTT + TUB(F)                                                                                                     | 214                                      |
| <i>TUB10</i>   | (R) TCATGAGTGACCACAAAACA + TUB(F)                                                                                                       | 271                                      |
| <i>TUB11</i>   | (R) CATTACCGTCATCGTCATAAG + TUB(F)                                                                                                      | 128                                      |
| <i>TUB12</i>   | (R) ATCACACAAACATTCATCACTG + TUB(F)                                                                                                     | 261                                      |
| <i>TUB13</i>   | (R) CAGCAAGACTGCAAAATCGGT + TUB(F)                                                                                                      | 204                                      |
| <i>TUB14</i>   | (R) CCAACTCTACCATTCACTAC + TUB(F)                                                                                                       | 275                                      |
| <i>TUB15</i>   | (R) ATGTATGAAAAATAGCAGCAGC + TUB(F)                                                                                                     | 207                                      |
| <i>TUB16</i>   | (R) CATGCAGAATACGCTGTAAAAG + TUB(F)                                                                                                     | 213                                      |
| <i>TUB17</i>   | (R) GGAGCAAACATATACCTGTGC + TUB(F)                                                                                                      | 211                                      |
| <i>TUB18</i>   | (R) AGCATCGATAGGAATCGGATA + TUB(F)                                                                                                      | 222                                      |
| <i>TUB19</i>   | (R) TGATGAAATAGCACAGCACAGA + TUB(F)                                                                                                     | 192                                      |
| <i>TUB20</i>   | (R) GCGTTAAGGAAATAGCCACAAT + TUB(F)                                                                                                     | 192                                      |
| -              | TUB(F) TTGCAYTGGTAYACHGGNGARGG (consensus primer)                                                                                       | -                                        |

**Supplemental Table S2.** List of proteins and their GenBank accession numbers used in sequence alignment and phylogenetic analyses

| Species                                       | Protein Name | Accession No. |
|-----------------------------------------------|--------------|---------------|
| <b><math>\alpha</math>-tubulin</b>            |              |               |
| <i>Arabidopsis thaliana</i>                   | ArathTUA1    | At1g64740     |
|                                               | ArathTUA2    | At1g50010     |
|                                               | ArathTUA3    | At5g19770     |
|                                               | ArathTUA4    | At1g04820     |
|                                               | ArathTUA5    | At5g19770     |
|                                               | ArathTUA6    | At4g14960     |
| <i>Betula pendula</i> (birch)                 | BetpeTUA     | CAB66336      |
| <i>Chlamydomonas reinhardtii</i> (green alga) | ChlreTUA2    | AAN87017      |
| <i>Eleusine indica</i> (goosegrass)           | EleinTUA1    | CAA06618      |
|                                               | EleinTUA2    | O22348        |
|                                               | EleinTUA3    | O22349        |
| <i>Gossypium hirsutum</i> (cotton)            | GoshiTUA2    | AAQ92662      |
|                                               | GoshiTUA3    | AAD50627      |
|                                               | GoshiTUA4    | AAQ92663      |
|                                               | GoshiTUA5    | AAD50629      |
|                                               |              |               |
| <i>Hordeum vulgare</i> (barley)               | HorvuTUA1    | CAA67942      |
|                                               | HorvuTUA2    | CAA69724      |
|                                               | HorvuTUA3    | CAA10663      |
| <i>Medicago truncatula</i> (barrel medic)     | MedtrTUA3    | ABN08980      |
|                                               | MedtrTUA1    | ABE93145      |
|                                               | MedtrTUA2    | ABE86411      |
| <i>Oryza sativa</i> (rice)                    | OrysaTUA1    | Os03g0726100  |
|                                               | OrysaTUA2    | Os11g0247300  |
|                                               | OrysaTUA3    | Os07g0574800  |
|                                               | OrysaTUA4    | Os03g0219300  |
| <i>Prunus dulcis</i> (almond)                 | PruduTUA     | CAA47635      |
| <i>Pseudotsuga menziesii</i> (douglas fir)    | PsemeTUA1    | AAV92379      |
| <i>Setaria viridis</i> (green foxtail)        | SetviTUA1    | CAE52514      |
|                                               | SetviTUA2    | CAE52515      |
| <i>Solanum tuberosum</i> (potato)             | SoltuTUA1    | ABB02631      |
|                                               | SoltuTUA2    | ABB16994      |
| <i>Zea mays</i> (maize)                       | ZeamaTUA2    | CAA33733      |
|                                               | ZeamaTUA3    | CAA44861      |
|                                               | ZeamaTUA5    | XAA44862      |
|                                               | ZeamaTUA6    | CAA44863      |
|                                               | GoshiTUA1    | AAQ92661      |
|                                               |              |               |
| <b><math>\beta</math>-tubulin</b>             |              |               |
| <i>Arabidopsis thaliana</i>                   | ArathTUB1    | At1g75780     |
|                                               | ArathTUB2    | At5g62690     |
|                                               | ArathTUB3    | At5g62700     |
|                                               | ArathTUB4    | At5g44340     |
|                                               | ArathTUB5    | At1g20010     |
|                                               | ArathTUB6    | At5g12250     |
|                                               | ArathTUB7    | At2g29550     |
|                                               | ArathTUB8    | At5g23860     |

|                                               |             |              |
|-----------------------------------------------|-------------|--------------|
|                                               | ArathTUB9   | At4g20890    |
| <i>Chlamydomonas reinhardtii</i> (green alga) | ChlreTUB1/2 | P04690       |
| <i>Eleusine indica</i> (goosegrass)           | EleinTUB1   | AAD20178     |
|                                               | EleinTUB2   | AAD20179     |
|                                               | EleinTUB3   | AAD20180     |
|                                               | EleinTUB4   | AAD20181     |
| <i>Gossypium hirsutum</i> (cotton)            | GoshiTUB1   | AAL92118     |
|                                               | GoshiTUB5   | AAQ92665     |
|                                               | GoshiTUB6   | AAQ92666     |
|                                               | GoshiTUB7   | AAQ92667     |
|                                               | GoshiTUB10  | AAN32988     |
| <i>Medicago truncatula</i> (barrel medic)     | MedtrTUB3   | ABE83854     |
|                                               | MedtrTUB4   | ABE83857     |
|                                               | MedtrTUB5   | ABE90057     |
|                                               | MedtrTUB1   | ABE81376     |
|                                               | MedtrTUB6   | ABE92128     |
|                                               | MedtrTUB2   | ABE81426     |
| <i>Oryza sativa</i> (rice)                    | OrysaTUB1   | Os01g0282800 |
|                                               | OrysaTUB2   | Os03g0105600 |
|                                               | OrysaTUB3   | Os06g0671900 |
|                                               | OrysaTUB4   | Os01g0805900 |
|                                               | OrysaTUB5   | Os02g0167300 |
|                                               | OrysaTUB6   | Os05g0413200 |
|                                               | OrysaTUB7   | Os03g0780600 |
|                                               | OrysaTUB8   | Os03g0661300 |
| <i>Setaria viridis</i> (green foxtail)        | SetviTUB1   | CAE52516     |
|                                               | SetviTUB2   | CAE52517     |
| <i>Solanum tuberosum</i> (potato)             | SoltuTUB3   | ABA46773     |
|                                               | SoltuTUB4   | ABA81852     |
|                                               | SoltuTUB1   | CAA83847     |
|                                               | SoltuTUB2   | CAA83853     |
| <i>Triticum aestivum</i> (wheat)              | TriaeTUB1   | AAD10487     |
|                                               | TriaeTUB2   | AAD10488     |
|                                               | TriaeTUB3   | AAD10489     |
|                                               | TriaeTUB4   | AAD10490     |
|                                               | TriaeTUB5   | AAD10492     |
| <i>Zea mays</i> (maize)                       | ZeamaTUB1   | CAA37060     |
|                                               | ZeamaTUB2   | CAA37061     |
|                                               | ZeamaTUB3   | CAA52718     |
|                                               | ZeamaTUB4   | CAA52719     |
|                                               | ZeamaTUB5   | CAA52720     |
|                                               | ZeamaTUB6   | Q41783       |
|                                               | ZeamaTUB7   | Q41784       |
|                                               | ZeamaTUB8   | Q41785       |
| <i>Zinnia elegans</i> (zinnia)                | ZinelTUB1   | BAA82637     |
|                                               | ZinelTUB2   | BAA82638     |

---
