# Supplementary material
Source: PubMed Central journal article supplement (PMC2048781)
Supplement: plntphys_pp.107.107086_2.pdf [file plntphys_pp.107.107086_2.pdf]

TUA1 MRECI SIHIGQAGIQVGNACWELYCLEHGIQPDGQMPGSDKIVGGGDDAFNTFFSETGAGKHVPRAIFVDLEPTVIDEVRTGTYRQLFHPE 90  
TUA3 MRECI SIHIGQAGIQVGNACWELYCLEHGIQPDGQMPGSDKIVGGGDDAFNTFFSETGAGKHVPRAIFVDLEPTVIDEVRTGTYRQLFHPE 90  
TUA5 MRECI SIHIGQAGIQVGNACWELYCLEHGIQPDGQMPGSDKIVGGGDDAFNTFFSETGAGKHVPRAIFVDLEPTVIDEVRTGTYRQLFHPE 90  
TUA7 MRECI SIHIGQAGIQVGNACWELYCLEHGIQPDGQMPGSDKIVGGGDDAFNTFFSETGAGKHVPRAIFVDLEPTVIDEVRTGTYRQLFHPE 90  
TUA2 MREI I SIHIGQAGIQVGNACWELYCLEHGIQPDGQMPGSDIVSGVEHDSFNTFFSETGSGKHVPRAIFVDLEPTVIDEVRTGTYRQLFHPE 90  
TUA4 MREI I SIHIGQAGIQVGNACWELYCLEHGIQPDGQMPGSDIVSGVEHDSFNTFFSETGSGKHVPRAIFVDLEPTVIDEVRTGTYRQLFHPE 90  
TUA6 MREI I SIHIGQAGIQVGNACWELYCLEHGIQPDGQMPGSDIVSGVEHDSFNTFFSETGSGKHVPRAIFVDLEPTVIDEVRTGTYRQLFHPE 90  
TUA8 MREI I SIHIGQAGIQVGNACWELYCLEHGIQPDGQMPGSDIVSGVEHDSFNTFFSETGSGKHVPRAIFVDLEPTVIDEVRTGTYRQLFHPE 90

TUA1 QLISGKEDAANNFARGHYITGKEIVDLCLDRIRKRLADNCTGLOGFLVFNNAVGGGTGSGLSGLLLERLSVDYGKSKLGFITYPSPQVST 180  
TUA3 QLISGKEDAANNFARGHYITGKEIVDLCLDRIRKRLADNCTGLOGFLVFNNAVGGGTGSGLSGLLLERLSVDYGKSKLGFITYPSPQVST 180  
TUA5 QLISGKEDAANNFARGHYITGKEIVDLCLDRIRKRLADNCTGLOGFLVFNNAVGGGTGSGLSGLLLERLSVDYGKSKLGFITYPSPQVST 180  
TUA7 QLISGKEDAANNFARGHYITGKEIVDLCLDRIRKRLADNCTGLOGFLVFNNAVGGGTGSGLSGLLLERLSVDYGKSKLGFITYPSPQVST 180  
TUA2 QLISGKEDAANNFARGHYITGKEIVDLCLDRIRKRLADNCTGLOGFLVFNNAVGGGTGSGLSGLLLERLSVDYGKSKLGFITYPSPQVST 180  
TUA4 QLISGKEDAANNFARGHYITGKEIVDLCLDRIRKRLADNCTGLOGFLVFNNAVGGGTGSGLSGLLLERLSVDYGKSKLGFITYPSPQVST 180  
TUA6 QLISGKEDAANNFARGHYITGKEIVDLCLDRIRKRLADNCTGLOGFLVFNNAVGGGTGSGLSGLLLERLSVDYGKSKLGFITYPSPQVST 180  
TUA8 QLISGKEDAANNFARGHYITGKEIVDLCLDRIRKRLADNCTGLOGFLVFNNAVGGGTGSGLSGLLLERLSVDYGKSKLGFITYPSPQVST 180

TUA1 VVEPYNSVLSTHSLLEHTDVAVLLDNEAIVDICRRSLDIERPTYTNLNRLLISQVIVSSLTASLRFDGAINVDVTEFQTNLVVPYRIHFMLS 270  
TUA3 VVEPYNSVLSTHSLLEHTDVAVLLDNEAIVDICRRSLDIERPTYTNLNRLLISQVIVSSLTASLRFDGAINVDVTEFQTNLVVPYRIHFMLS 270  
TUA5 VVEPYNSVLSTHSLLEHTDVAVLLDNEAIVDICRRSLDIERPTYTNLNRLLISQVIVSSLTASLRFDGAINVDVTEFQTNLVVPYRIHFMLS 270  
TUA7 VVEPYNSVLSTHSLLEHTDVAVLLDNEAIVDICRRSLDIERPTYTNLNRLLISQVIVSSLTASLRFDGAINVDVTEFQTNLVVPYRIHFMLS 270  
TUA2 VVEPYNSVLSTHSLLEHTDVAVLLDNEAIVDICRRSLDIERPTYTNLNRLLISQVIVSSLTASLRFDGAINVDVTEFQTNLVVPYRIHFMLS 270  
TUA4 VVEPYNSVLSTHSLLEHTDVAVLLDNEAIVDICRRSLDIERPTYTNLNRLLISQVIVSSLTASLRFDGAINVDVTEFQTNLVVPYRIHFMLS 270  
TUA6 VVEPYNSVLSTHSLLEHTDVAVLLDNEAIVDICRRSLDIERPTYTNLNRLLISQVIVSSLTASLRFDGAINVDVTEFQTNLVVPYRIHFMLS 270  
TUA8 VVEPYNSVLSTHSLLEHTDVAVLLDNEAIVDICRRSLDIERPTYTNLNRLLISQVIVSSLTASLRFDGAINVDVTEFQTNLVVPYRIHFMLS 270

TUA1 SYAPVISA EKAYHEQLSVPEITNSAFEPSSMMAKCDPRHGKYMACLMLYRGDVVVKDVNAAVATIKTKRTVQFVDCPTGPKCGINYP 360  
TUA3 SYAPVISA EKAYHEQLSVPEITNSAFEPSSMMAKCDPRHGKYMACLMLYRGDVVVKDVNAAVATIKTKRTVQFVDCPTGPKCGINYP 360  
TUA5 SYAPVISA EKAYHEQLSVPEITNSAFEPSSMMAKCDPRHGKYMACLMLYRGDVVVKDVNAAVATIKTKRTVQFVDCPTGPKCGINYP 360  
TUA7 SYAPVISA EKAYHEQLSVPEITNSAFEPSSMMAKCDPRHGKYMACLMLYRGDVVVKDVNAAVATIKTKRTVQFVDCPTGPKCGINYP 360  
TUA2 SYAPVISA EKAYHEQLSVPEITNSAFEPSSMMAKCDPRHGKYMACLMLYRGDVVVKDVNAAVATIKTKRTVQFVDCPTGPKCGINYP 360  
TUA4 SYAPVISA EKAYHEQLSVPEITNSAFEPSSMMAKCDPRHGKYMACLMLYRGDVVVKDVNAAVATIKTKRTVQFVDCPTGPKCGINYP 360  
TUA6 SYAPVISA EKAYHEQLSVPEITNSAFEPSSMMAKCDPRHGKYMACLMLYRGDVVVKDVNAAVATIKTKRTVQFVDCPTGPKCGINYP 360  
TUA8 SYAPVISA EKAYHEQLSVPEITNSAFEPSSMMAKCDPRHGKYMACLMLYRGDVVVKDVNAAVATIKTKRTVQFVDCPTGPKCGINYP 360

TUA1 TVVPGDDLAKVQRAVCMISNSNSVAEVFSRIDHKFDLMYKRAFVHWYVGEEMEEGFSEAREDLAALAEKDYEEVGABSGDGEDGDEGEY 451  
TUA3 TVVPGDDLAKVQRAVCMISNSNSVAEVFSRIDHKFDLMYKRAFVHWYVGEEMEEGFSEAREDLAALAEKDYEEVGABSGDGEDGDEGEY 450  
TUA5 TVVPGDDLAKVQRAVCMISNSNSVAEVFSRIDHKFDLMYKRAFVHWYVGEEMEEGFSEAREDLAALAEKDYEEVGABSGDGEDGDEGEY 450  
TUA7 TVVPGDDLAKVQRAVCMISNSNSVAEVFSRIDHKFDLMYKRAFVHWYVGEEMEEGFSEAREDLAALAEKDYEEVGABSGDGEDGDEGEY 450  
TUA2 TVVPGDDLAKVQRAVCMISNNNAVAEVFSRIDHKFDLMYKRAFVHWYVGEEMEEGFSEAREDLAALAEKDYEEVGABSGVDEDE--DDEDE 449  
TUA4 TVVPGDDLAKVQRAVCMISNNNAVAEVFSRIDHKFDLMYKRAFVHWYVGEEMEEGFSEAREDLAALAEKDYEEVGABSGVDEDE--DDEDE 449  
TUA6 TVVPGDDLAKVQRAVCMISNNNAVAEVFSRIDHKFDLMYKRAFVHWYVGEEMEEGFSEAREDLAALAEKDYEEVGABSGDDEG--DEDEY 449  
TUA8 TVVPGDDLAKVQRAVCMISNNNAVAEVFSRIDHKFDLMYKRAFVHWYVGEEMEEGFSEAREDLAALAEKDYEEVGABSGDDEG--DEDEY 449

Supplemental Figure S1
