# Supplementary material
Source: PubMed Central journal article supplement (PMC2048781)
Supplement: plntphys_pp.107.107086_3.pdf [file plntphys_pp.107.107086_3.pdf]

## SUPPLEMENTAL FIGURE LEGENDS

**Supplemental Figure S1.** Sequence alignment of full-length *Populus* TUA proteins.

**Supplemental Figure S2.** Sequence alignment of full-length *Populus* TUB proteins.
